# Supplementary material for: Extraction and purification of ε-poly-l-lysine from fermentation broth using an ethanol/ammonium sulfate aqueous two-phase system combined with ultrafiltration
Source: Royal Society of Chemistry journal article supplement (doi:10.1039/d0ra04245e), 2020-01-01
Supplement: d0ra04245e1.pdf [file d0ra04245e1.pdf]

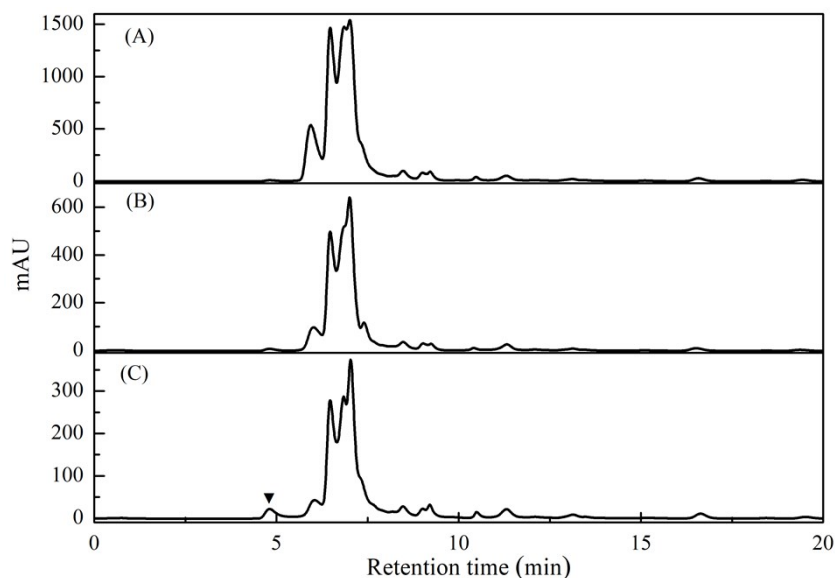

**Supplementary Fig. 1** HPLC chromatograms of  $\epsilon$ -PL analysis for the bottom phase during the ethanol/ammonium sulfate ATPS extraction. (a) first APTS extraction, (b) second APTS extraction, (c) third APTS extraction. Triangle indicates the  $\epsilon$ -PL.

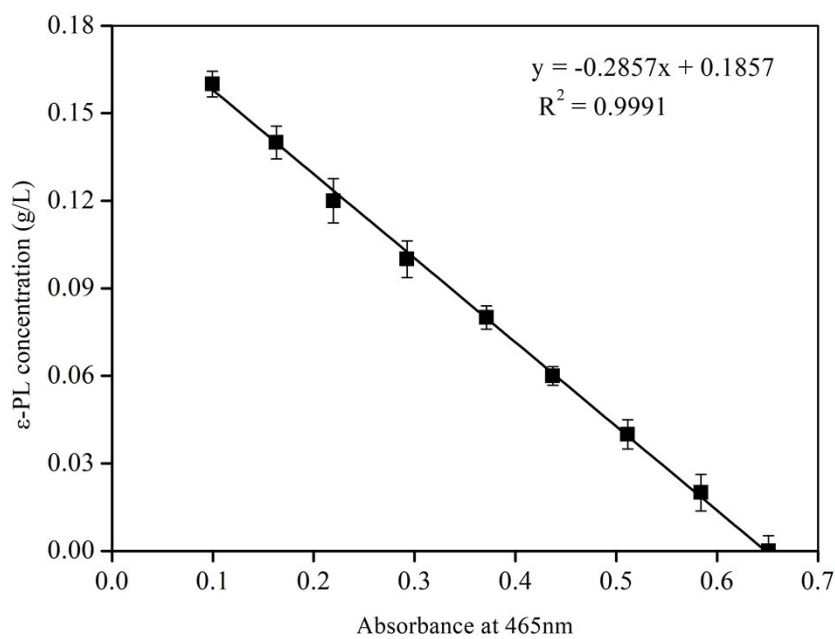

**Supplementary Fig. 2** The standard curve of  $\epsilon$ -PL using methyl orange method
